# Supplementary material for: The influence of substitution and weak interactions on the crystal structures of a series of 2,6-disubstituted N-arylthioamides
Source: Royal Society of Chemistry journal article supplement (doi:10.1039/b820944h), 2009-01-01

<sup>1</sup>H-NMR data for N-arylformamides **1-5** ( $\delta$  in ppm, <sup>1</sup>H-<sup>1</sup>H coupling constants in Hz)

| Compound                  | Solvent                       | Conformer          | Methyl H and Methine H  | Ar H            | CHS                                | NH                          |
|---------------------------|-------------------------------|--------------------|-------------------------|-----------------|------------------------------------|-----------------------------|
| <b>2,6-DiF-S (15)</b>     | DMSO                          | <i>trans</i> ~ 33% | -                       | m, 7.40         | s, 9.71                            | s, 11.65                    |
|                           |                               | <i>cis</i> ~ 66%   | -                       | m, 7.53         | s – broad, 9.98                    | d 11.91<br><i>J</i> = 13.86 |
| <b>2,6-DiCl-S (16)</b>    | DMSO                          | <i>trans</i> ~ 33% | -                       | m, 7.40         | d, 9.62<br><i>J</i> = 5.46         | s, broad 11.83              |
|                           |                               | <i>cis</i> ~ 66%   | -                       | m, 7.59         | d, broad, 9.38<br><i>J</i> = 13.68 | s, broad 11.85              |
| <b>2,6-DiMe-S (17)</b>    | C <sub>6</sub> D <sub>6</sub> | <i>trans</i> ~ 33% | s, 1.98                 | m, 6.66<br>6.80 | d, 9.01<br><i>J</i> = 5.68         | s, broad 8.24               |
|                           |                               | <i>cis</i> ~ 66%   | s, 1.78                 | 6.92            | d, broad, 8.82<br><i>J</i> = 14.75 |                             |
| <b>2-Cl-6-Me-S (18)</b>   | DMSO                          | <i>Trans</i> ~ 33% | s, 2.33                 | m, 7.49         | d, 9.63<br><i>J</i> = 3.18         | s, broad, 11.68             |
|                           |                               | <i>Cis</i> ~ 66%   | s, 2.25                 | m, 7.38         | d, 9.34<br><i>J</i> = 14.10        | s, broad, 11.68             |
| <b>2,6-DiBr-S (19)</b>    |                               | <i>trans</i> ~ 33% | -                       | m, 7.02<br>7.29 | s, 9.61                            | s, broad 8.68               |
|                           |                               | <i>cis</i> ~ 66%   | -                       | 7.57            | d, 9.47<br><i>J</i> = 11.08        |                             |
| <b>2,6-Diiso 6-S (20)</b> | CDCl <sub>3</sub>             | <i>Trans</i> ~ 70% | s, 1.44<br>septet, 3.06 | m, 7.15         | d, 9.06<br><i>J</i> = 15.00        | d, 9.39                     |
|                           |                               | <i>cis</i> - 30%   | s, 1.17<br>septet, 2.96 | m, 7.28         | d, 8.90                            | s, 9.74                     |

### Differential Scanning Calorimetry Scans

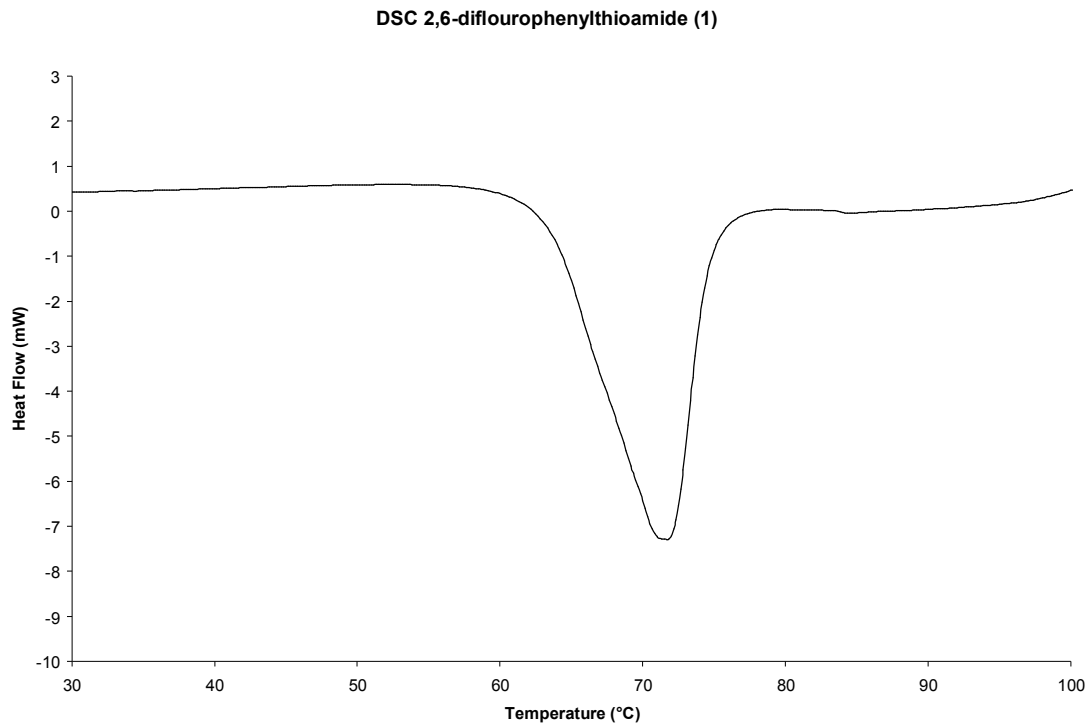

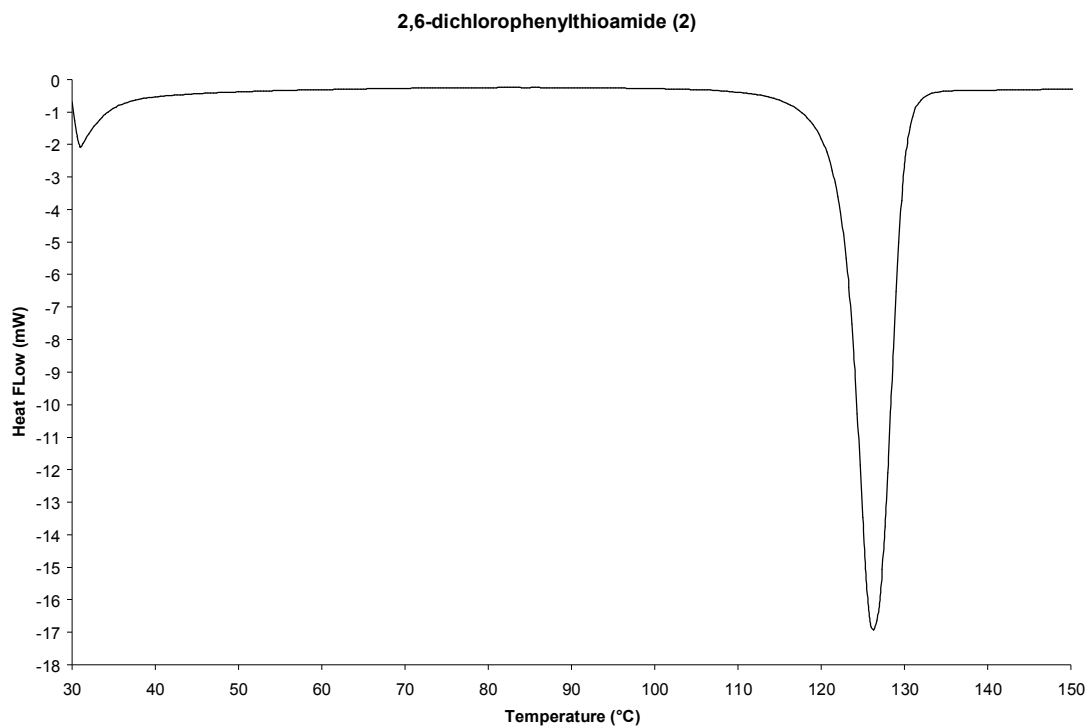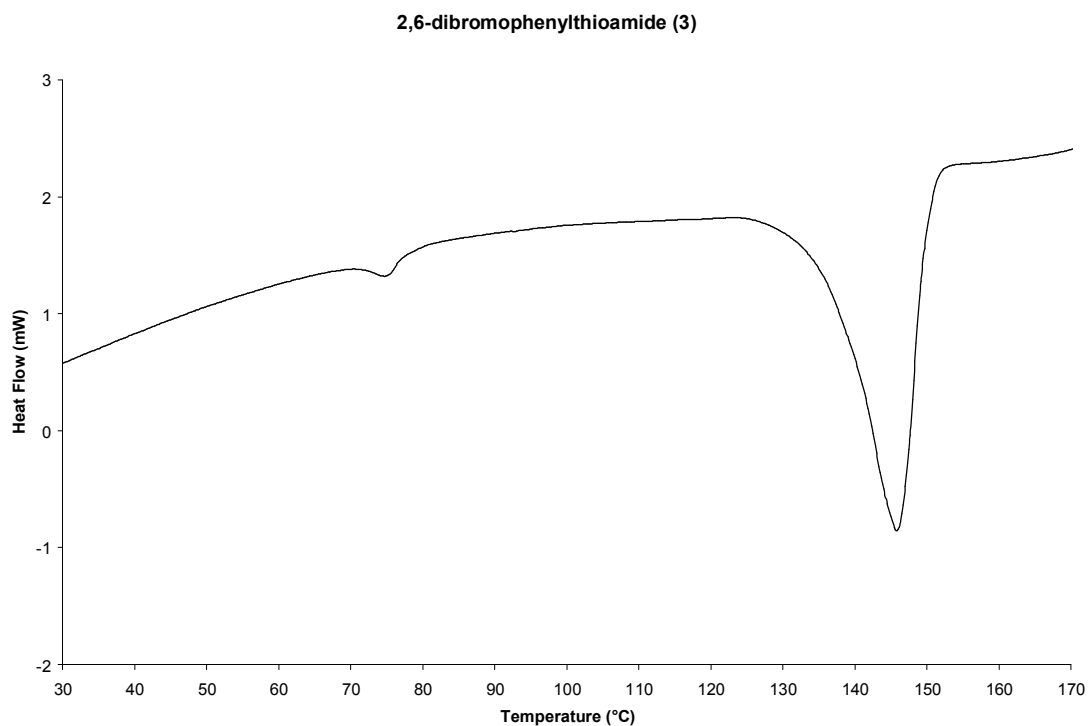

**2,6-dimethylphenylthioamide (4)**

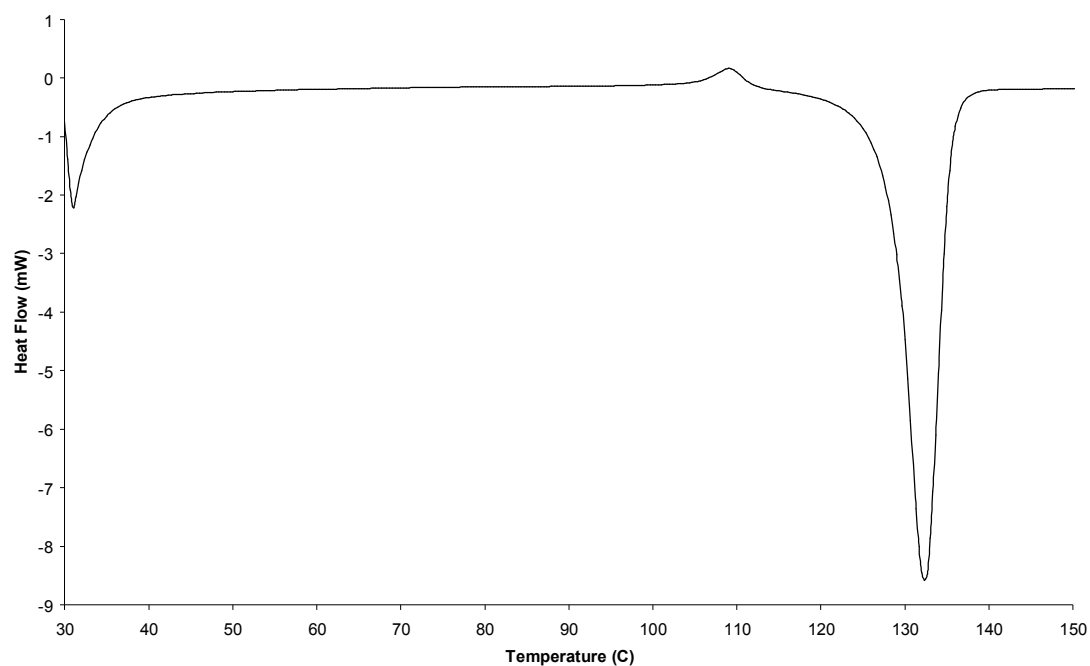

**2-chloro-6-methylphenylthioamide (5)**

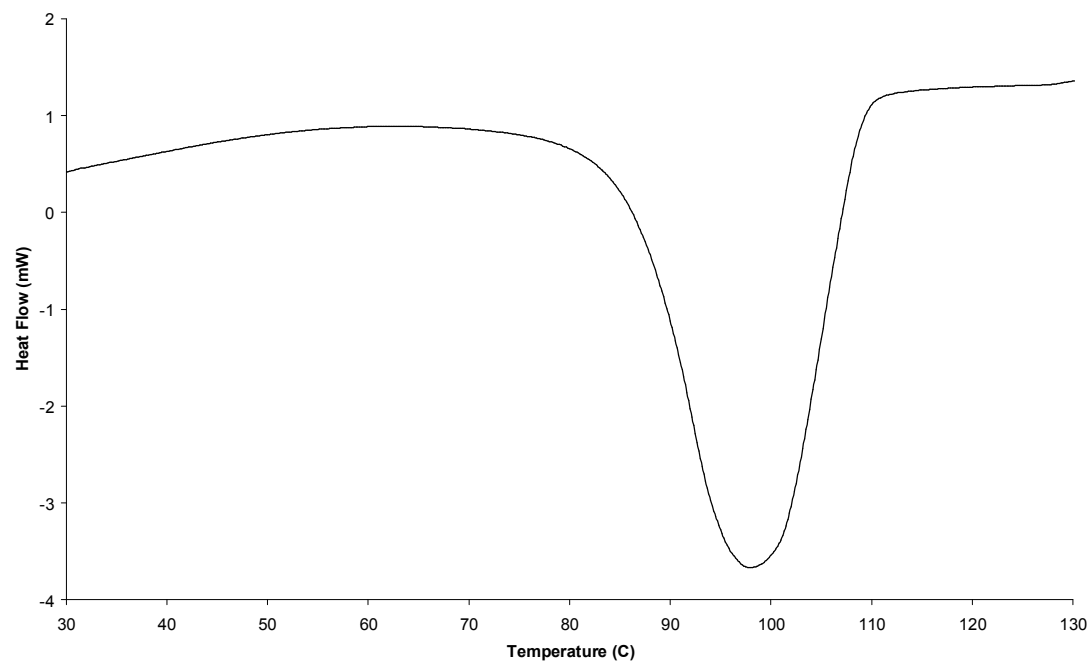

Supplement: b820944h.pdf [file b820944h.pdf]
